# Supplementary material
Source: PubMed Central journal article supplement (PMC6951807)
Supplement: NIHMS1544409-supplement-2.pdf [file NIHMS1544409-supplement-2.pdf]

## Supplementary Material

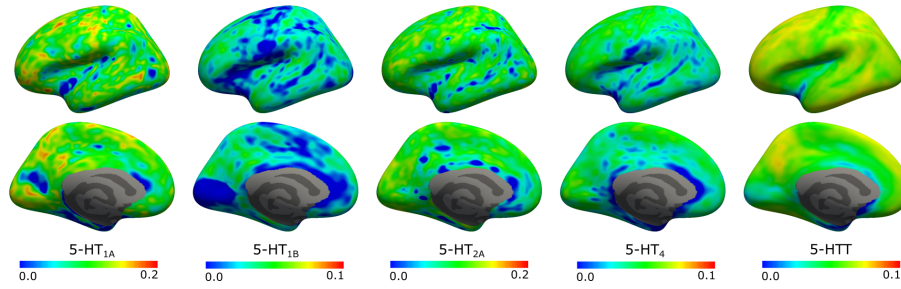

Supplementary Figure 1: Standard deviation maps of mean normalized BP<sub>ND</sub> bootstrap samples. Maps are displayed on the lateral (top) and medial (bottom) views of the fsaverage surface (left hemisphere, inflated)

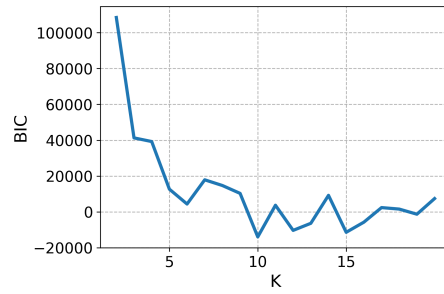

Supplementary Figure 2: Bayesian information criterion (BIC) associated with the parcellations obtained with  $K$  clusters. A minimum indicating an optimal model is found at  $K = 10$ .
